# Supplementary material for: Phragmalin-Type Limonoids from the Fruits of Chukrasia tabularis and Their Anti-Inflammatory Activity
Source: MDPI journal article supplement (doi:10.3390/molecules28135136), 2023-06-30
Supplement: s1 [file s1]

# Supporting Information

## **Phragmalin-type limonoids from the fruits of *Chukrasia tabularis* and their anti-inflammatory activity**

**Shu-Jun Dai <sup>1</sup>, Yu-Zhen Wu <sup>1</sup>, Xiu-Juan Xin <sup>1</sup> and Fa-Liang An <sup>1,2\*</sup>**

<sup>1</sup> State Key Laboratory of Bioreactor Engineering, East China University of Science and Technology, 130 Meilong Road, Shanghai 200237, China

<sup>2</sup> Marine Biomedical Science and Technology Innovation Platform of Lin-gang Special Area, No.4, Lane 218, Haiji Sixth Road, Shanghai 201306, China

\*Correspondence: [flan2016@ecust.edu.cn](mailto:flan2016@ecust.edu.cn); Tel.: +86-21-6425-3823

# Contents

|             |                                                                                   |
|-------------|-----------------------------------------------------------------------------------|
| Figure S1.  | $^1\text{H}$ NMR (500 MHz, $\text{CDCl}_3$ ) spectrum of compound <b>1</b>        |
| Figure S2.  | $^{13}\text{C}$ NMR (125 MHz, $\text{CDCl}_3$ ) spectrum of compound <b>1</b>     |
| Figure S3.  | HSQC spectrum of compound <b>1</b> in $\text{CDCl}_3$                             |
| Figure S4.  | $^1\text{H}$ - $^1\text{H}$ COSY spectrum of compound <b>1</b> in $\text{CDCl}_3$ |
| Figure S5.  | HMBC spectrum of compound <b>1</b> in $\text{CDCl}_3$                             |
| Figure S6.  | ROESY spectrum of compound <b>1</b> in $\text{CDCl}_3$                            |
| Figure S7.  | HRESIMS spectrum of compound <b>1</b>                                             |
| Figure S8.  | $^1\text{H}$ NMR (500 MHz, $\text{CDCl}_3$ ) spectrum of compound <b>2</b>        |
| Figure S9.  | $^{13}\text{C}$ NMR (125 MHz, $\text{CDCl}_3$ ) spectrum of compound <b>2</b>     |
| Figure S10. | HSQC spectrum of compound <b>2</b> in $\text{CDCl}_3$                             |
| Figure S11. | $^1\text{H}$ - $^1\text{H}$ COSY spectrum of compound <b>2</b> in $\text{CDCl}_3$ |
| Figure S12. | HMBC spectrum of compound <b>2</b> in $\text{CDCl}_3$                             |
| Figure S13. | ROESY spectrum of compound <b>2</b> in $\text{CDCl}_3$                            |
| Figure S14. | HRESIMS spectrum of compound <b>2</b>                                             |
| Figure S15. | $^1\text{H}$ NMR (500 MHz, $\text{CDCl}_3$ ) spectrum of compound <b>3</b>        |
| Figure S16. | $^{13}\text{C}$ NMR (125 MHz, $\text{CDCl}_3$ ) spectrum of compound <b>3</b>     |
| Figure S17. | HSQC spectrum of compound <b>3</b> in $\text{CDCl}_3$                             |
| Figure S18. | $^1\text{H}$ - $^1\text{H}$ COSY spectrum of compound <b>3</b> in $\text{CDCl}_3$ |
| Figure S19. | HMBC spectrum of compound <b>3</b> in $\text{CDCl}_3$                             |
| Figure S20. | ROESY spectrum of compound <b>3</b> in $\text{CDCl}_3$                            |
| Figure S21. | HRESIMS spectrum of compound <b>3</b>                                             |
| Figure S22. | $^1\text{H}$ NMR (500 MHz, $\text{CDCl}_3$ ) spectrum of compound <b>4</b>        |
| Figure S23. | $^{13}\text{C}$ NMR (125 MHz, $\text{CDCl}_3$ ) spectrum of compound <b>4</b>     |
| Figure S24. | HSQC spectrum of compound <b>4</b> in $\text{CDCl}_3$                             |
| Figure S25. | $^1\text{H}$ - $^1\text{H}$ COSY spectrum of compound <b>4</b> in $\text{CDCl}_3$ |
| Figure S26. | HMBC spectrum of compound <b>4</b> in $\text{CDCl}_3$                             |
| Figure S27. | ROESY spectrum of compound <b>4</b> in $\text{CDCl}_3$                            |
| Figure S28. | HRESIMS spectrum of compound <b>4</b>                                             |
| Figure S29. | $^1\text{H}$ NMR (500 MHz, $\text{CDCl}_3$ ) spectrum of compound <b>5</b>        |
| Figure S30. | $^{13}\text{C}$ NMR (125 MHz, $\text{CDCl}_3$ ) spectrum of compound <b>5</b>     |
| Figure S31. | HSQC spectrum of compound <b>5</b> in $\text{CDCl}_3$                             |
| Figure S32. | $^1\text{H}$ - $^1\text{H}$ COSY spectrum of compound <b>5</b> in $\text{CDCl}_3$ |
| Figure S33. | HMBC spectrum of compound <b>5</b> in $\text{CDCl}_3$                             |
| Figure S34. | ROESY spectrum of compound <b>5</b> in $\text{CDCl}_3$                            |
| Figure S35. | HRESIMS spectrum of compound <b>5</b>                                             |

Figure S1.  $^1\text{H}$  NMR (500 MHz,  $\text{CDCl}_3$ ) spectrum of compound **1**

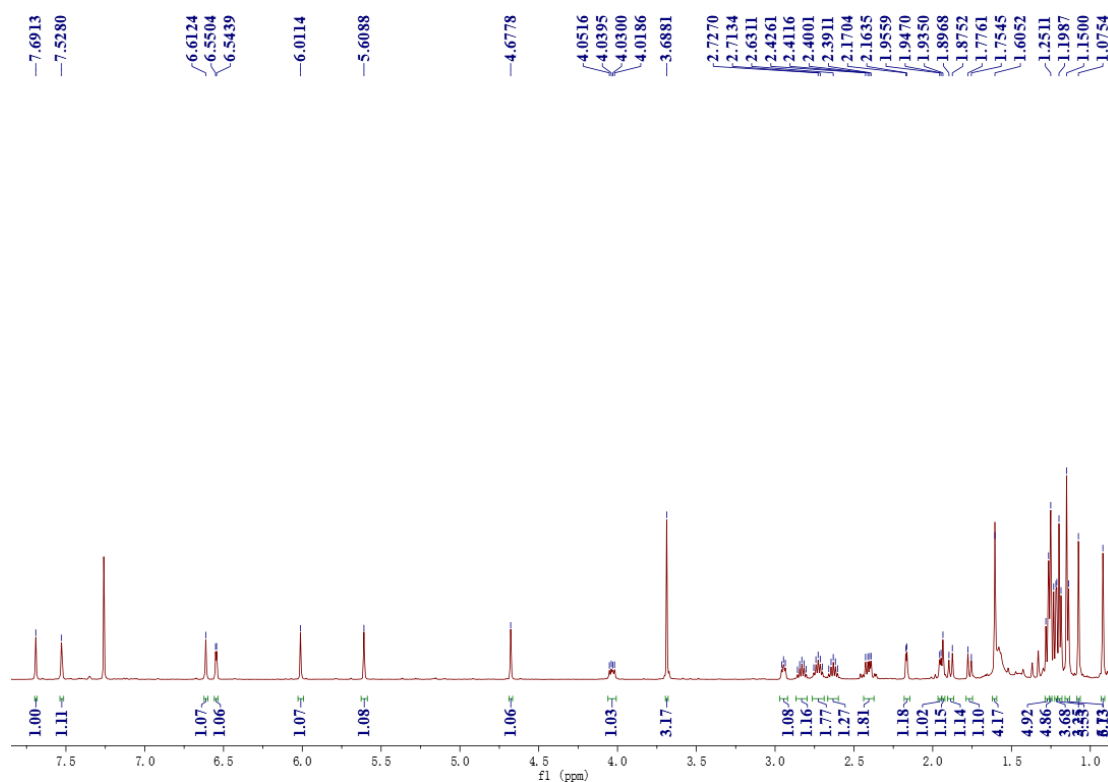

Figure S2.  $^{13}\text{C}$  NMR (125 MHz,  $\text{CDCl}_3$ ) spectrum of compound **1**

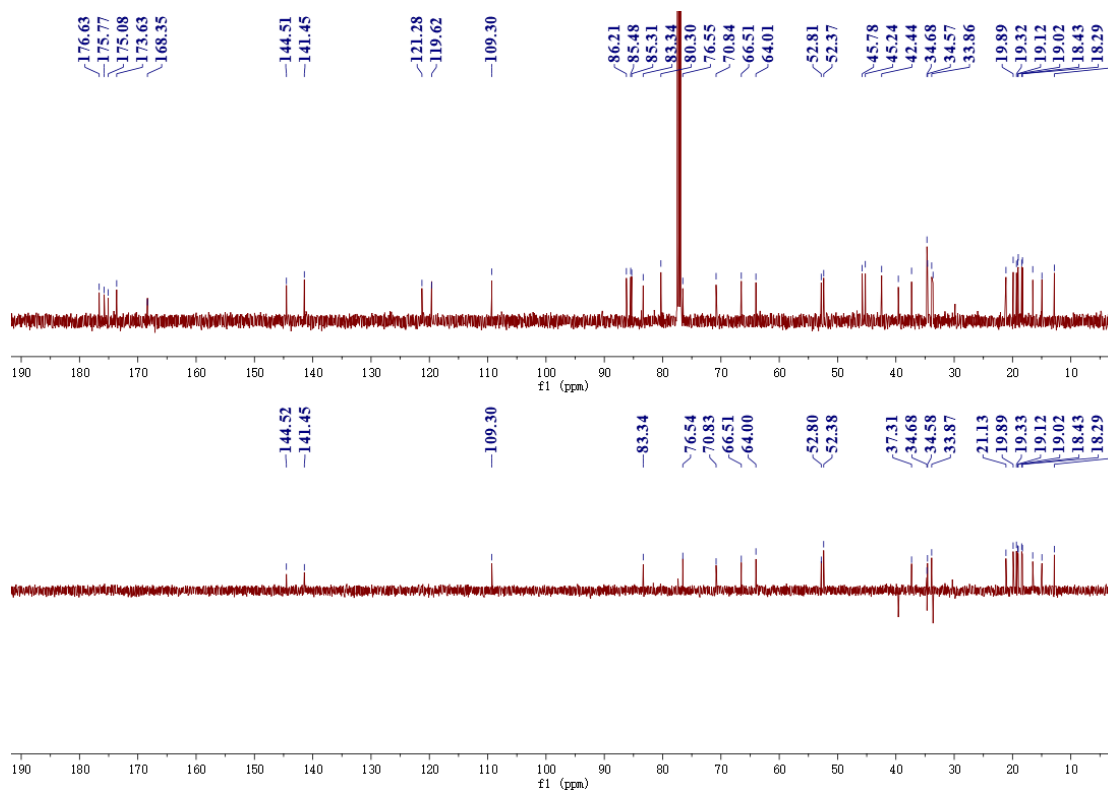

Figure S3. HSQC spectrum of compound **1** in CDCl<sub>3</sub>

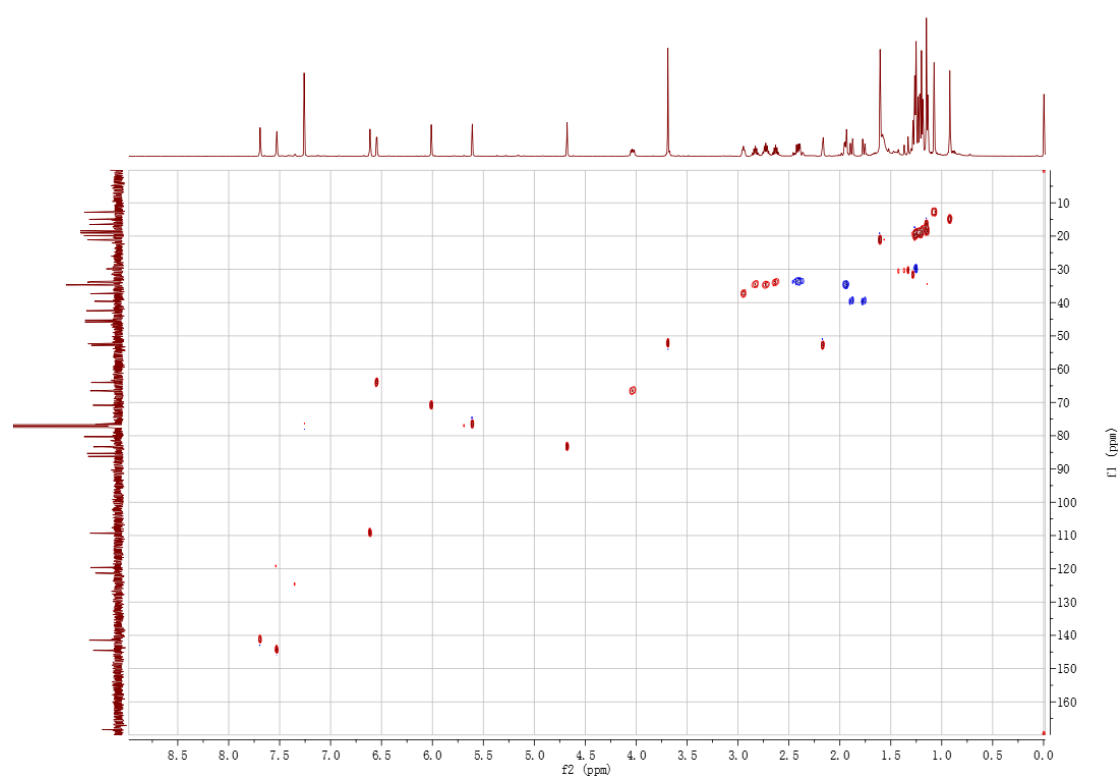

Figure S4. <sup>1</sup>H-<sup>1</sup>H COSY spectrum of compound **1** in CDCl<sub>3</sub>

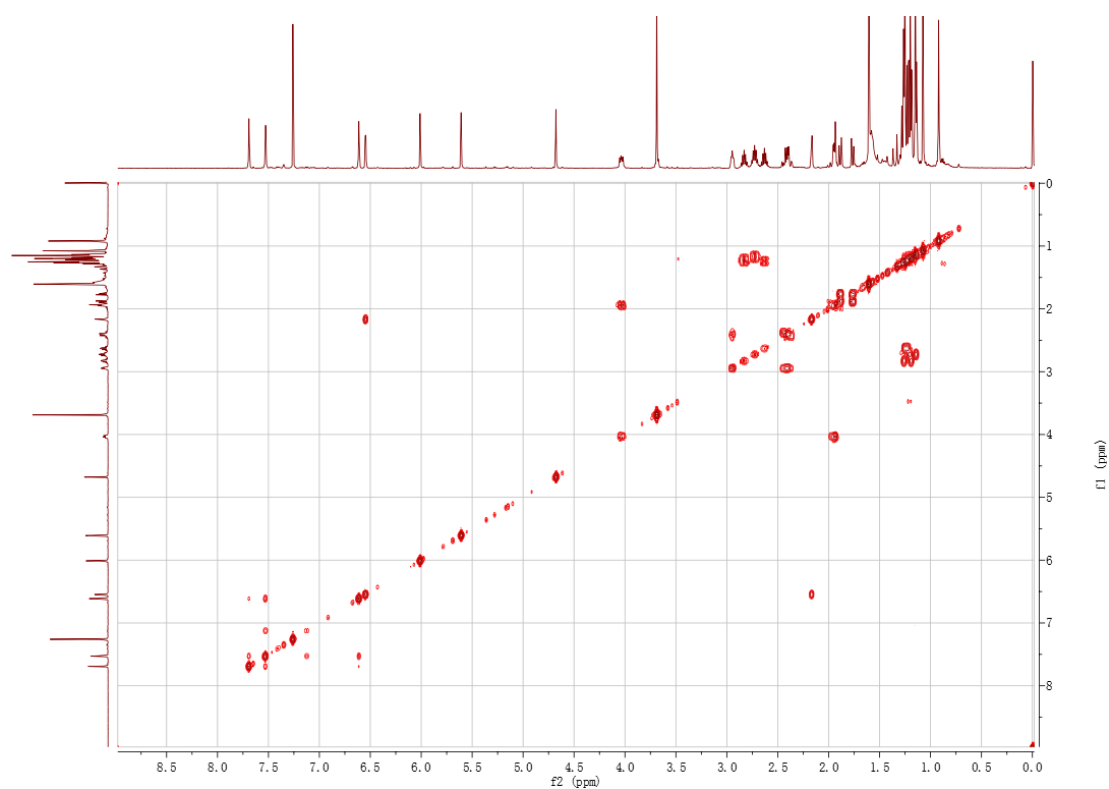

Figure S5. HMBC spectrum of compound **1** in CDCl<sub>3</sub>

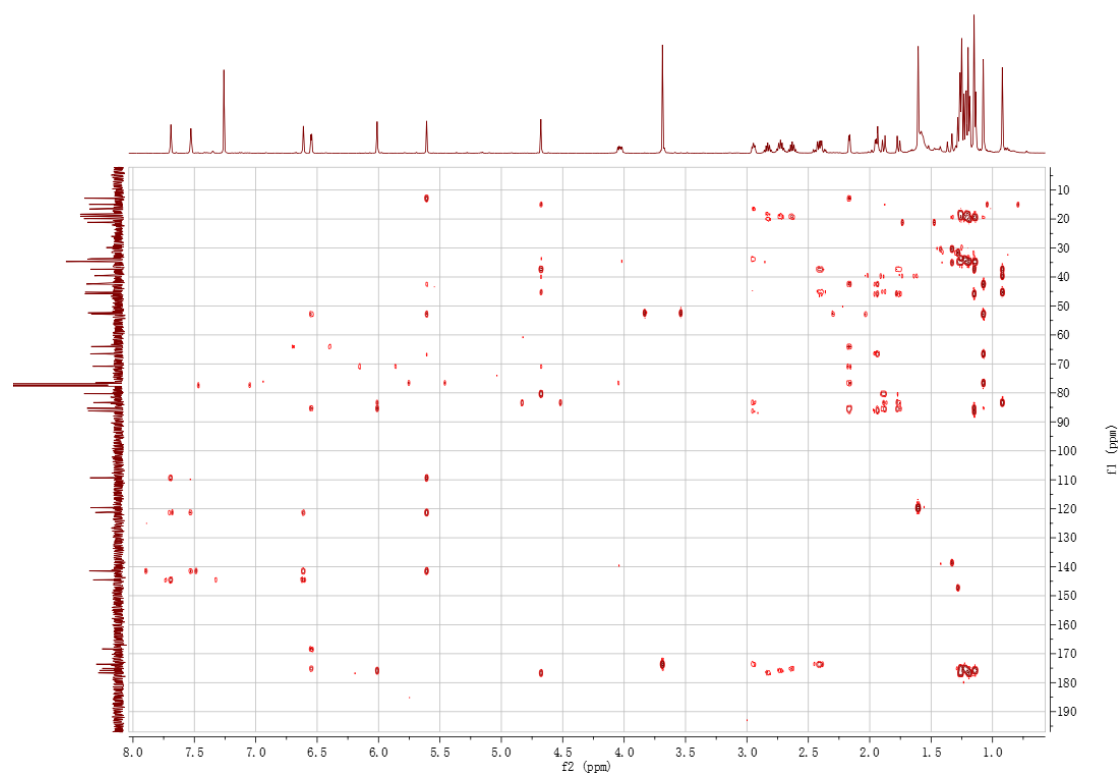

Figure S6. ROESY spectrum of compound **1** in CDCl<sub>3</sub>

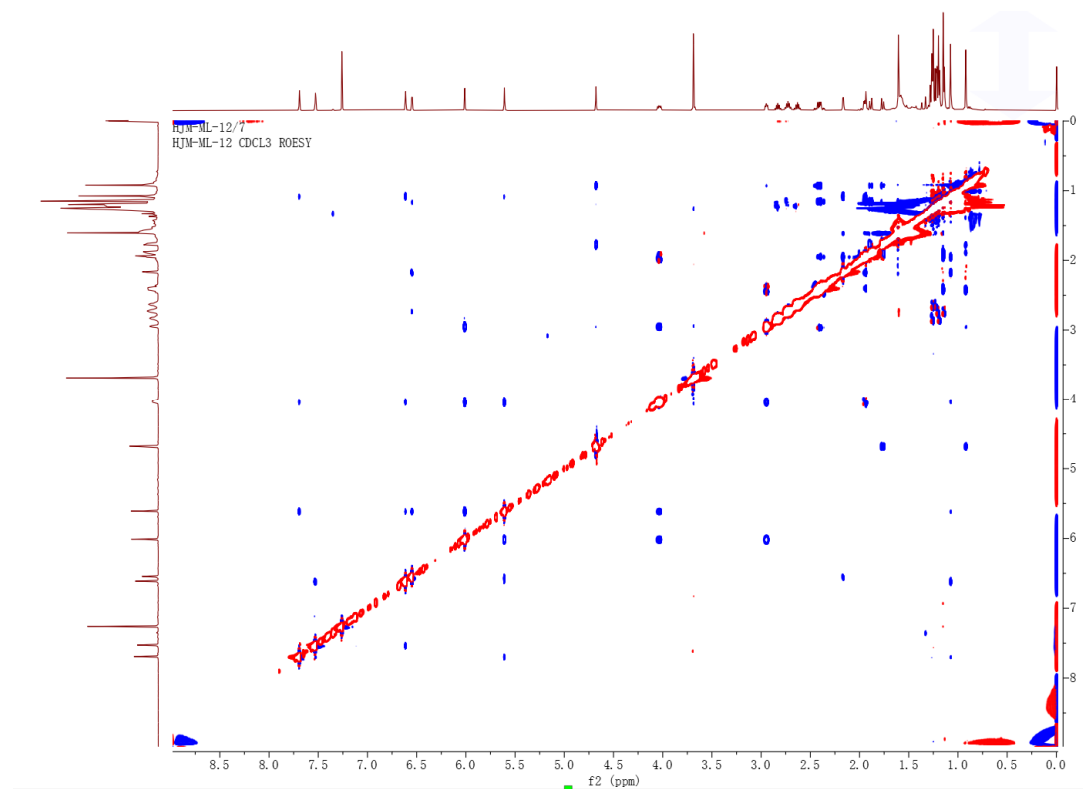

Figure S7. HRESIMS spectrum of compound 1

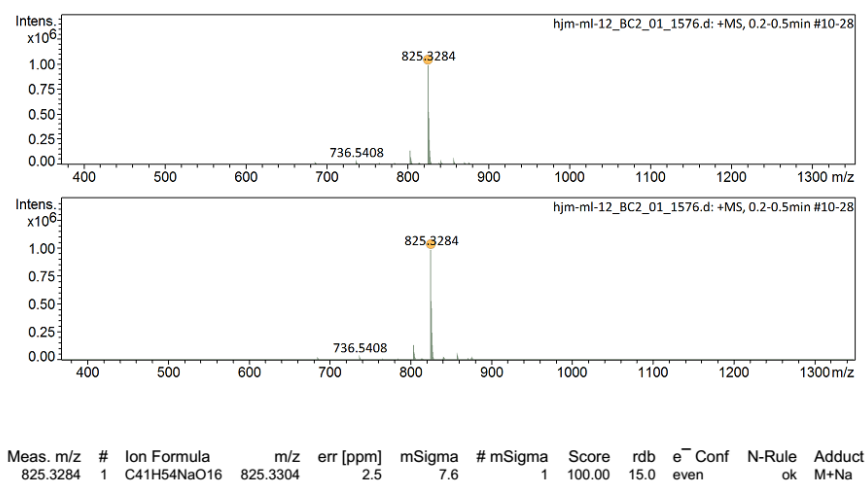

Figure S8. <sup>1</sup>H NMR (500 MHz, CDCl<sub>3</sub>) spectrum of compound 2

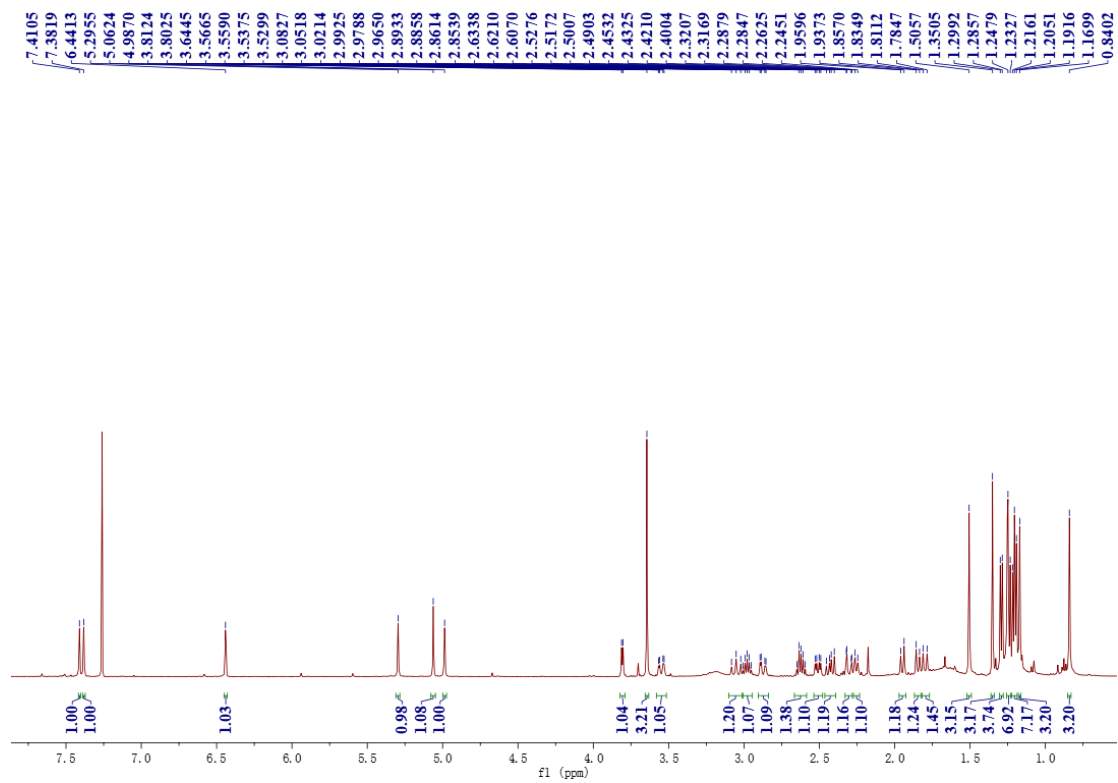

Figure S9.  $^{13}\text{C}$  NMR (125 MHz,  $\text{CDCl}_3$ ) spectrum of compound **2**

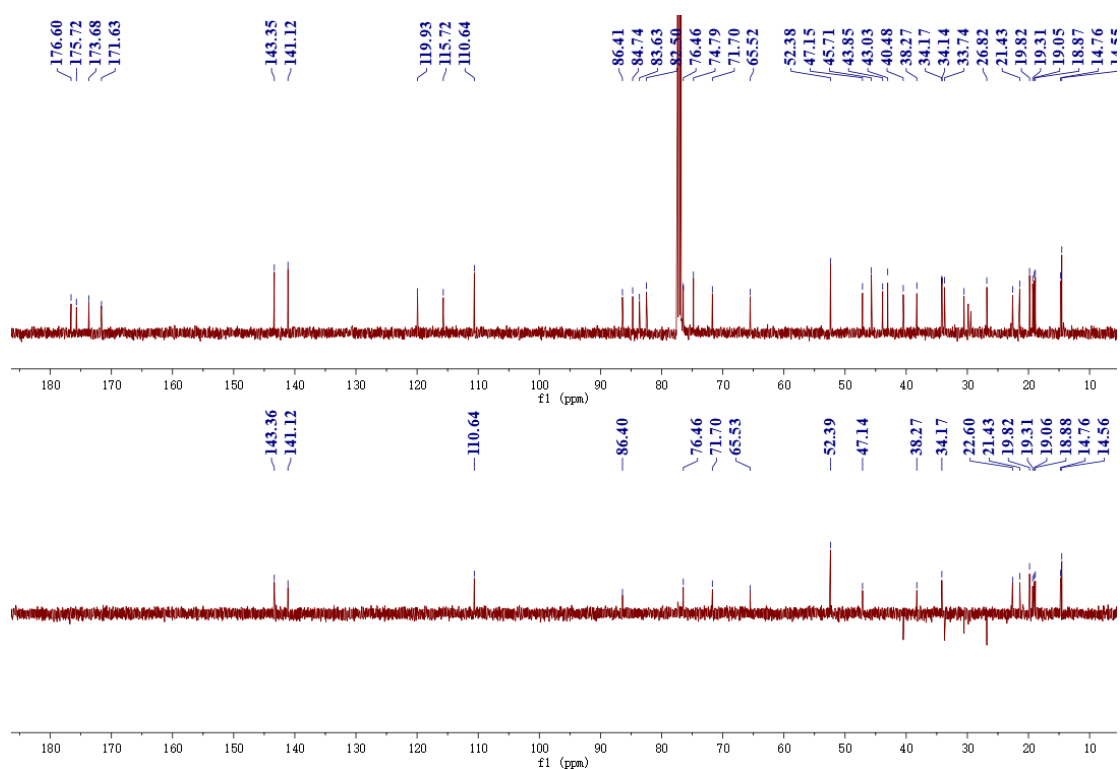

Figure S10. HSQC spectrum of compound **2** in  $\text{CDCl}_3$

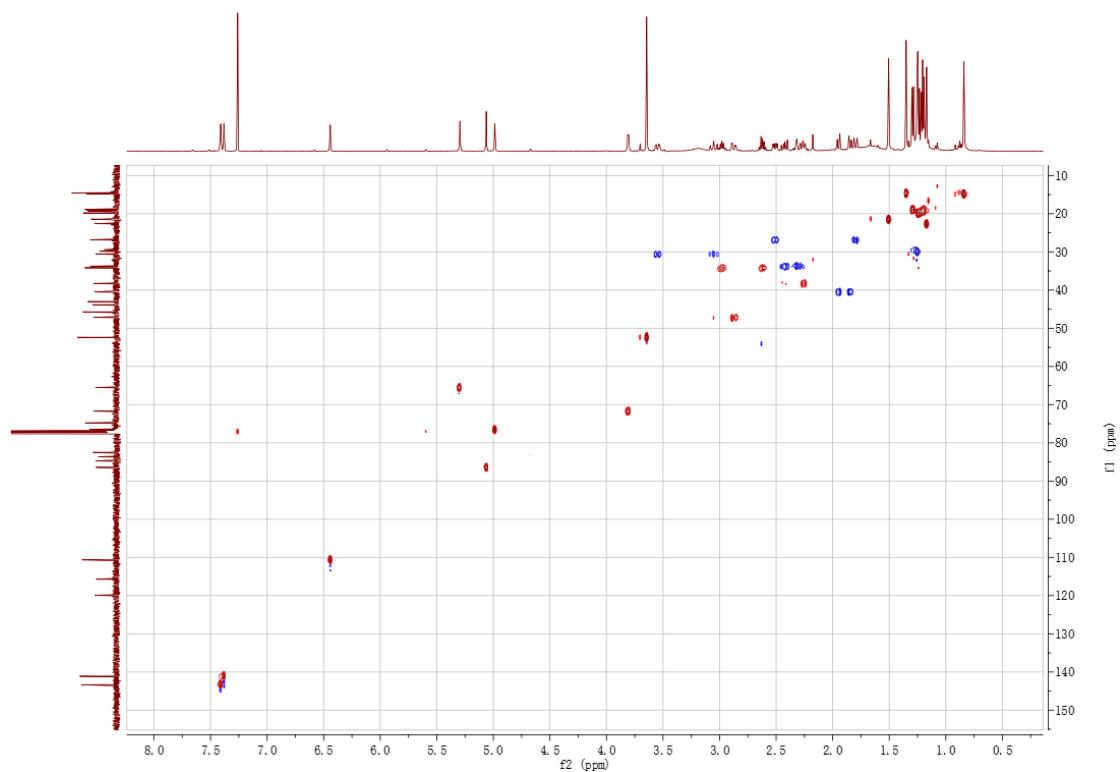

Figure S11.  $^1\text{H}$ - $^1\text{H}$  COSY spectrum of compound **2** in  $\text{CDCl}_3$

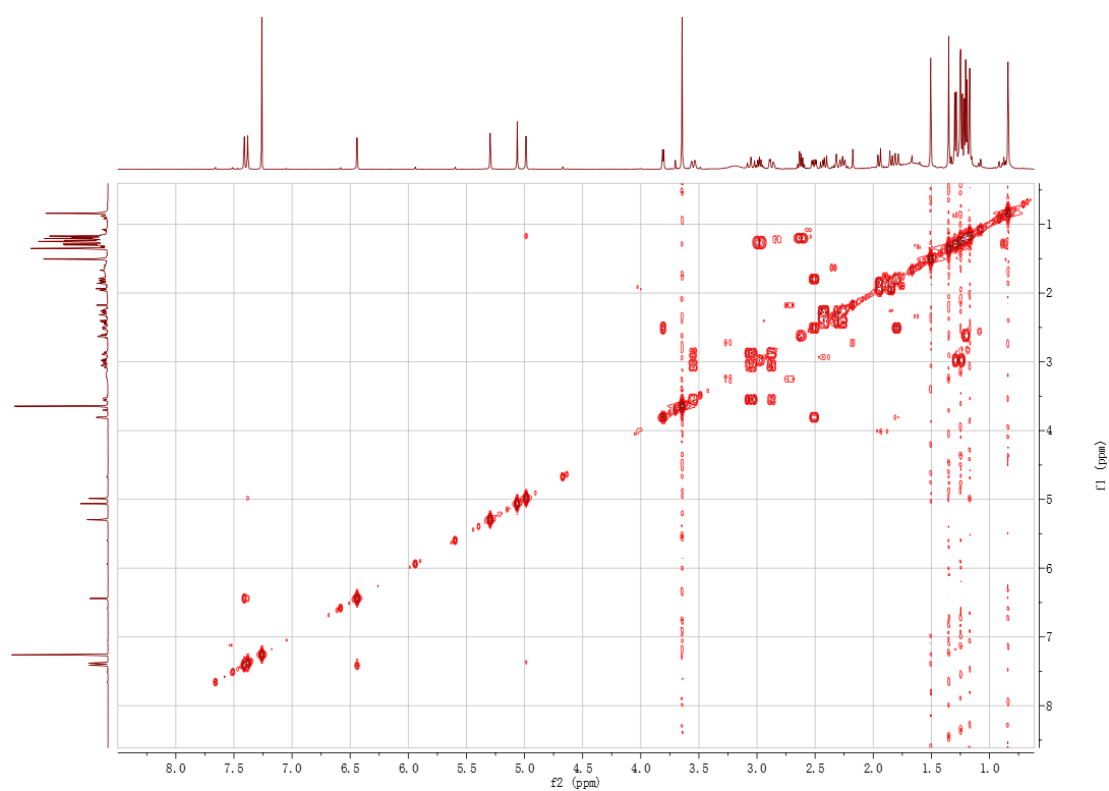

Figure S12. HMBC spectrum of compound **2** in  $\text{CDCl}_3$

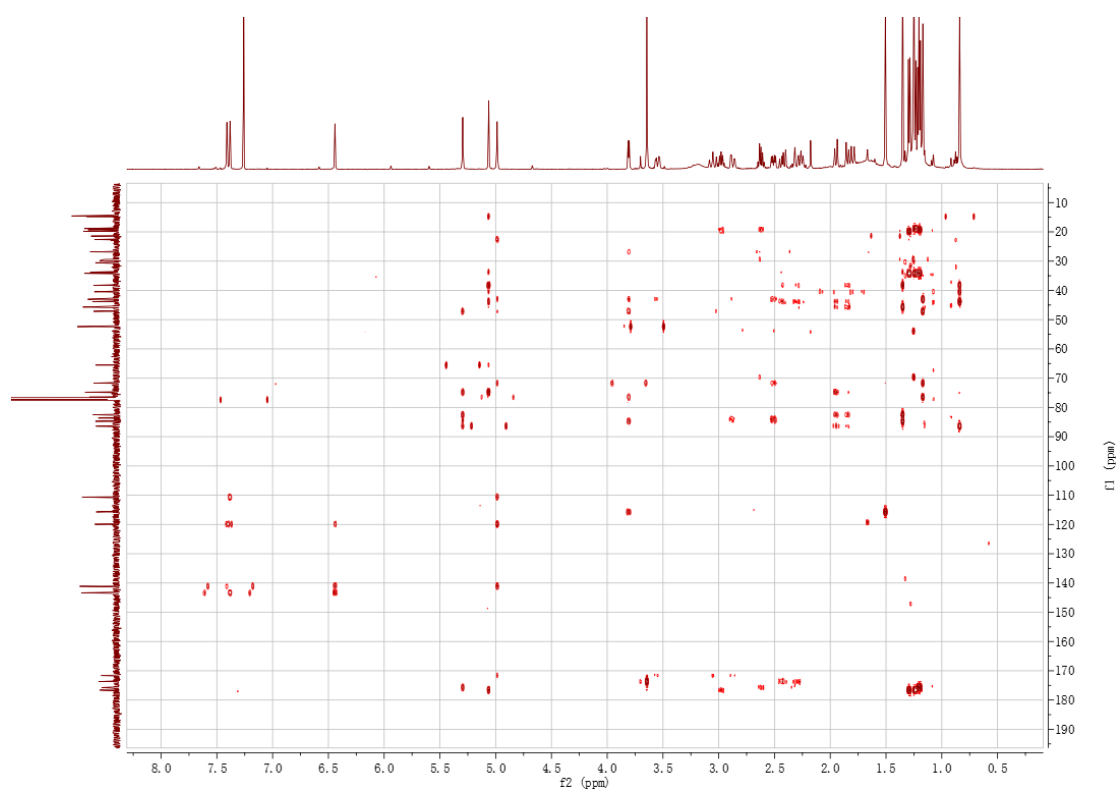



Figure S13. ROESY spectrum of compound **2** in CDCl<sub>3</sub>

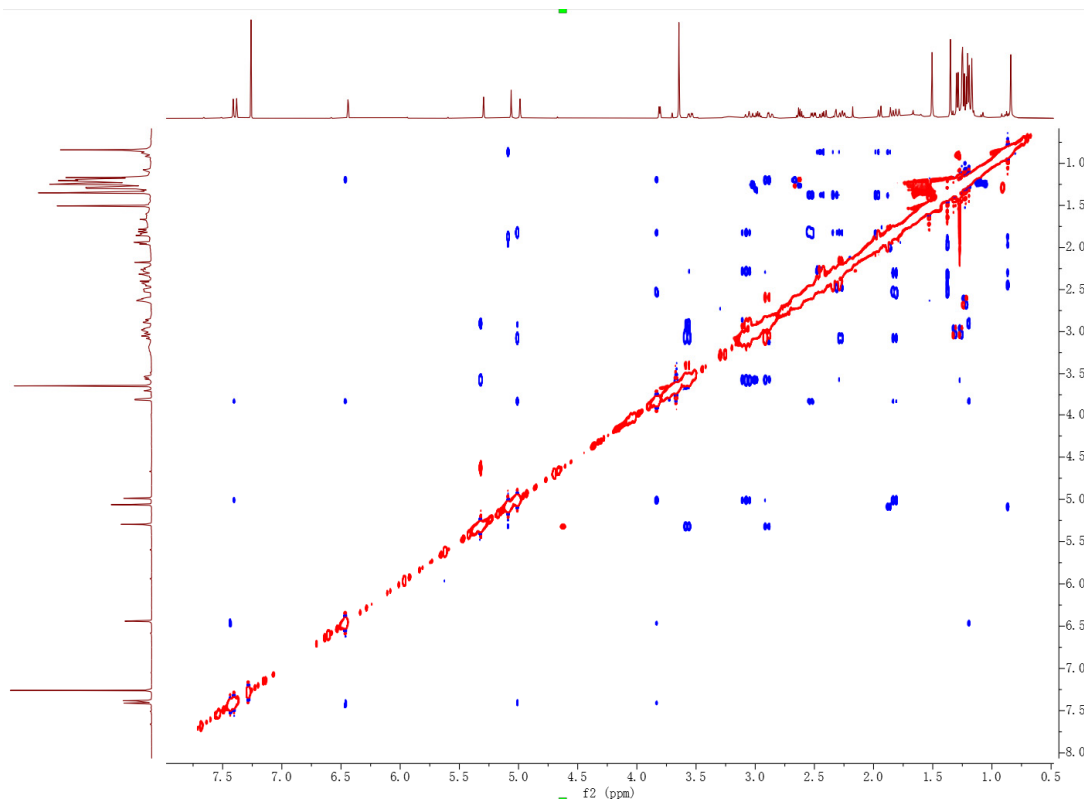

Figure S14. HRESI-MS spectrum of compound **2**

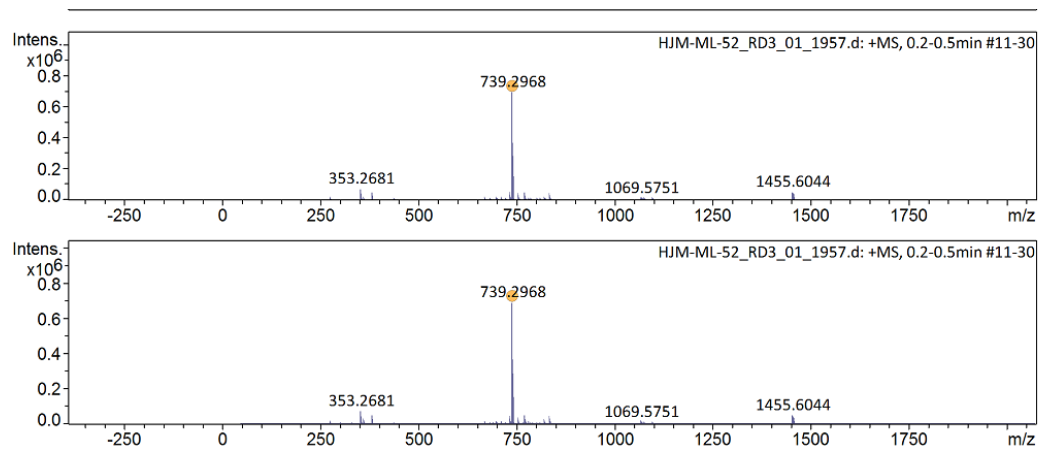

| Meas. m/z | # | Ion Formula | m/z      | err [ppm] | mSigma | # mSigma | Score  | rdb  | e <sup>-</sup> Conf | N-Rule | Adduct |
|-----------|---|-------------|----------|-----------|--------|----------|--------|------|---------------------|--------|--------|
| 739.2968  | 1 | C37H48NaO14 | 739.2936 | -4.2      | 3.1    | 1        | 100.00 | 14.0 | even                | ok     | M+Na   |

Figure S15.  $^1\text{H}$  NMR (500 MHz,  $\text{CDCl}_3$ ) spectrum of compound 3

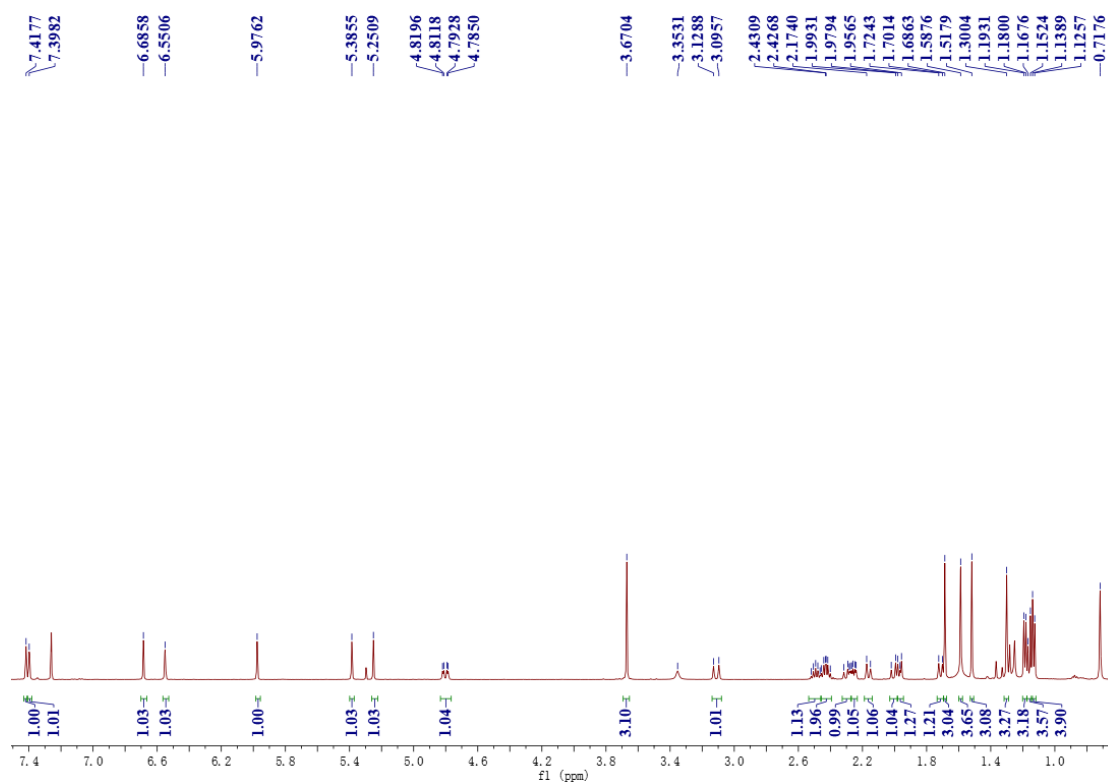

Figure S16.  $^{13}\text{C}$  NMR (125 MHz,  $\text{CDCl}_3$ ) spectrum of compound 3

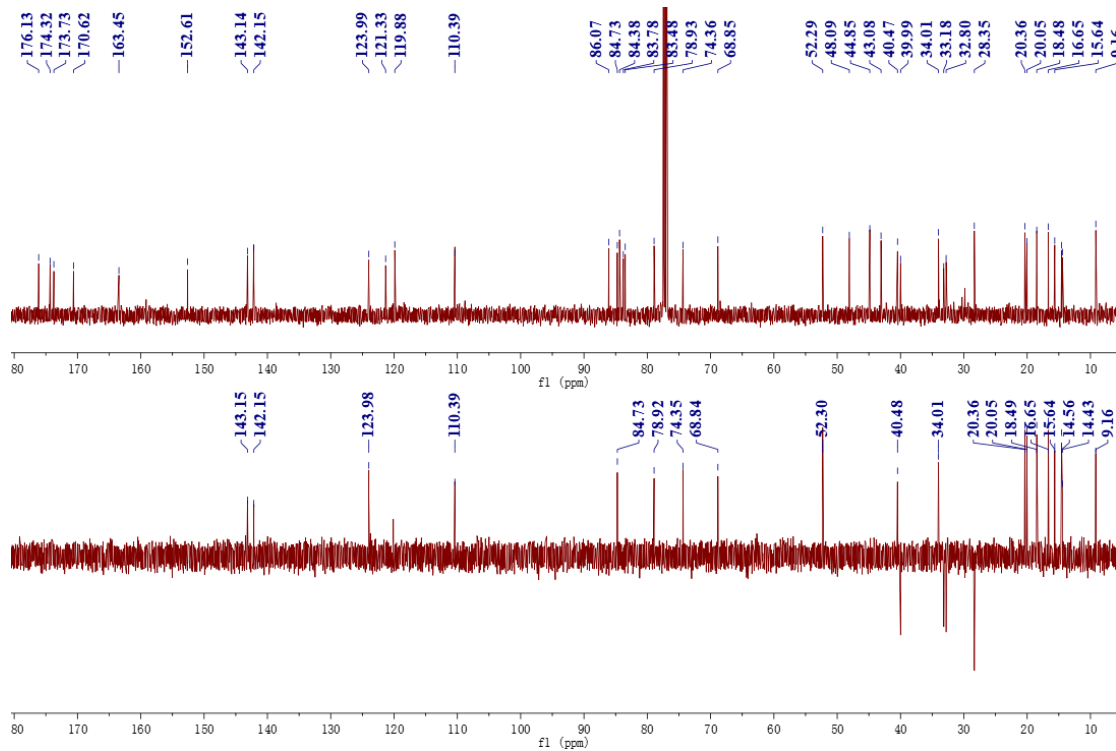

Figure S17. HSQC spectrum of compound **3** in CDCl<sub>3</sub>

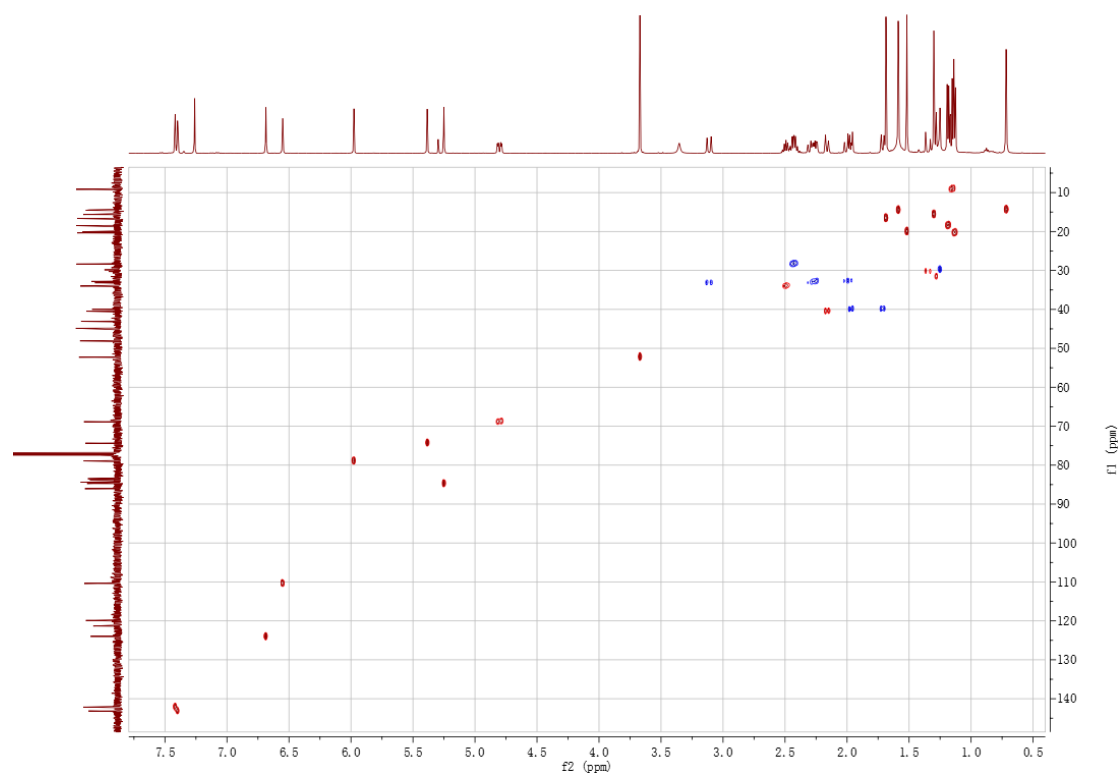

Figure S18. <sup>1</sup>H-<sup>1</sup>H COSY spectrum of compound **3** in CDCl<sub>3</sub>

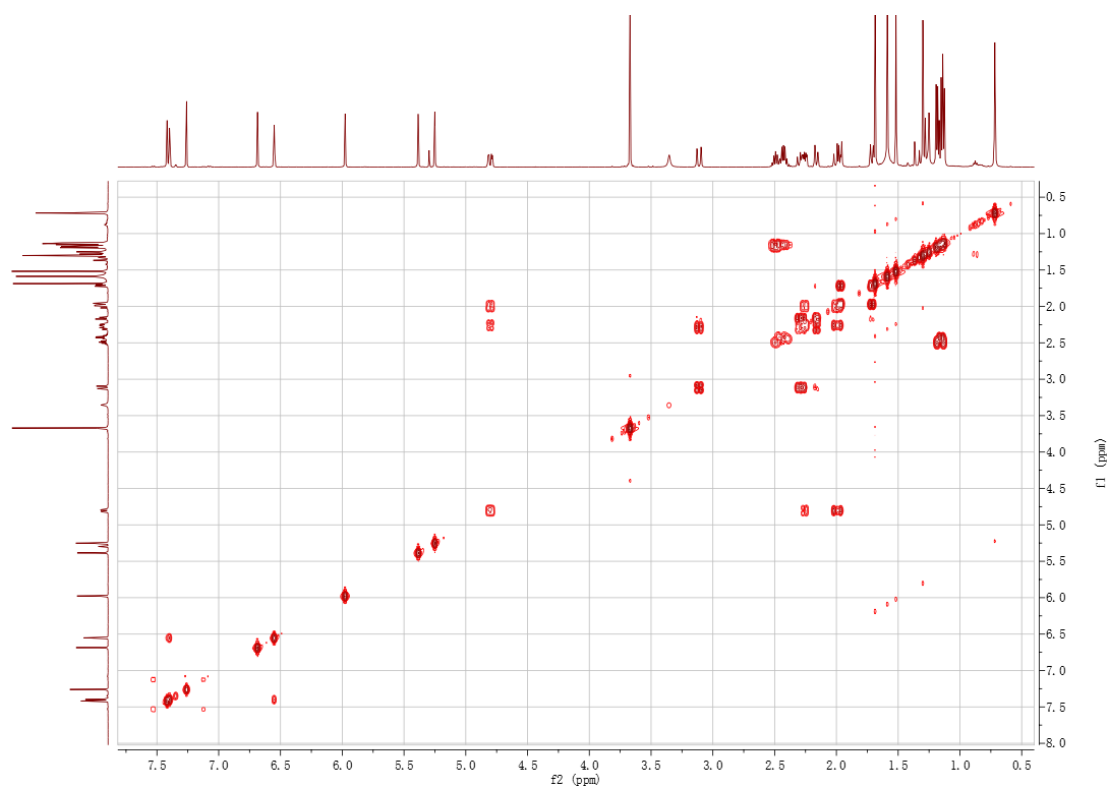

Figure S19. HMBC spectrum of compound **3** in CDCl<sub>3</sub>

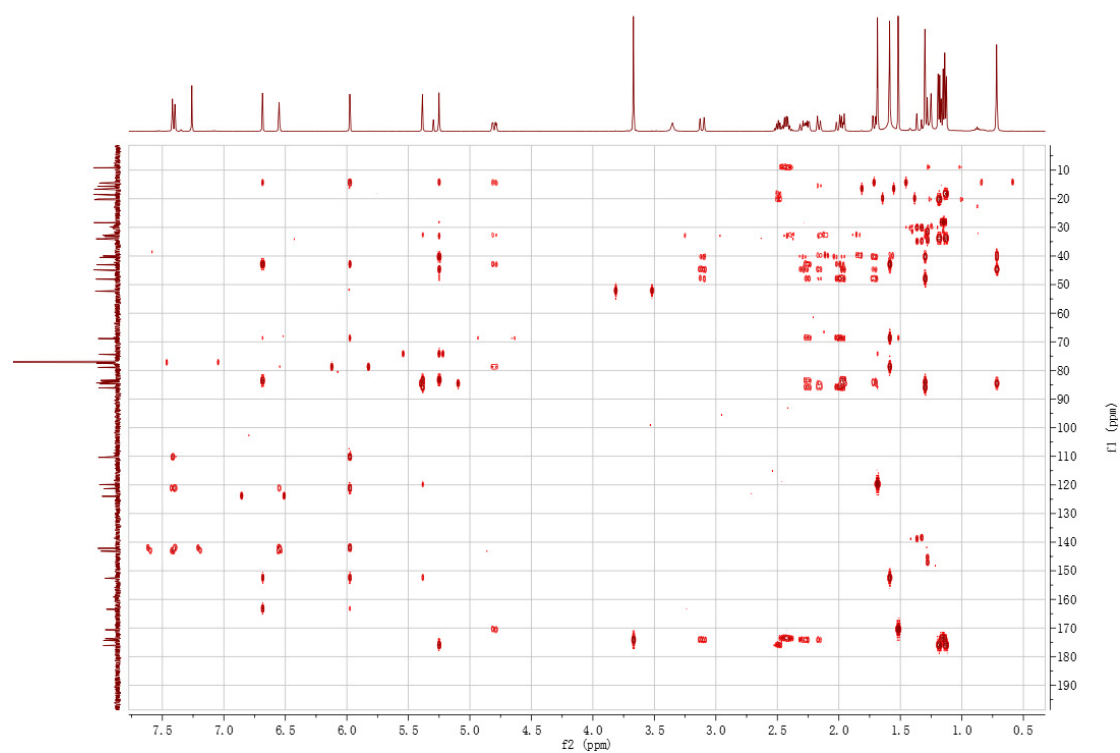

Figure S20. ROESY spectrum of compound **3** in CDCl<sub>3</sub>

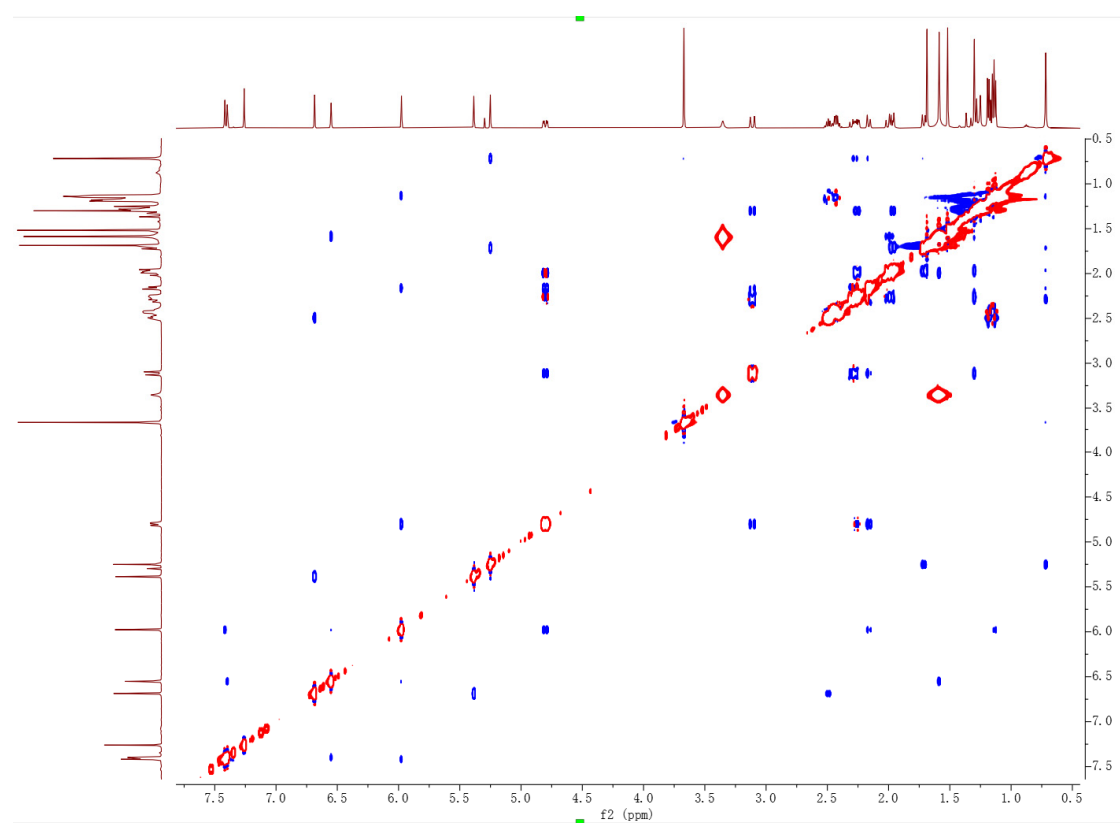

Figure S21. HRESI-MS spectrum of compound 3

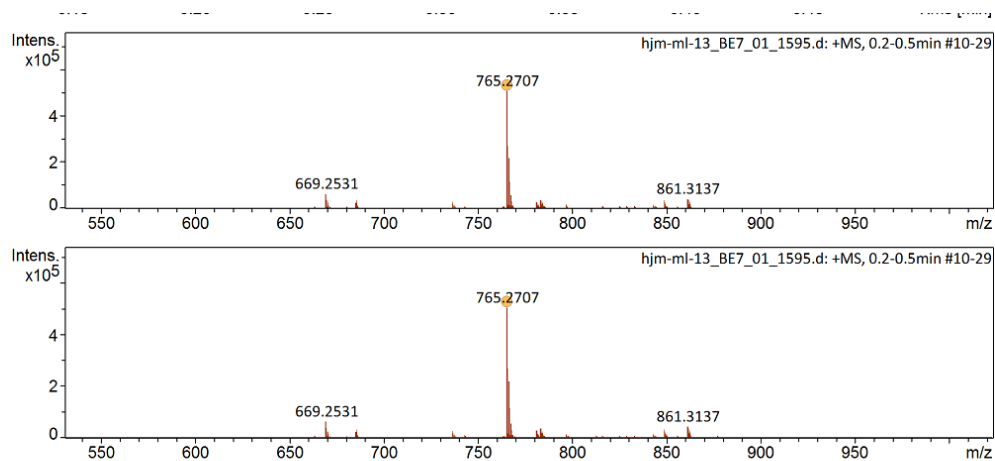

| Meas. m/z | # | Ion Formula | m/z      | err [ppm] | mSigma | # mSigma | Score  | rdb  | e <sup>-</sup> Conf | N-Rule | Adduct |
|-----------|---|-------------|----------|-----------|--------|----------|--------|------|---------------------|--------|--------|
| 765.2707  | 1 | C38H46NaO15 | 765.2729 | 2.8       | 4.8    | 1        | 100.00 | 16.0 | even                | ok     | M+Na   |

Figure S22. <sup>1</sup>H NMR (500 MHz, CDCl<sub>3</sub>) spectrum of compound 4

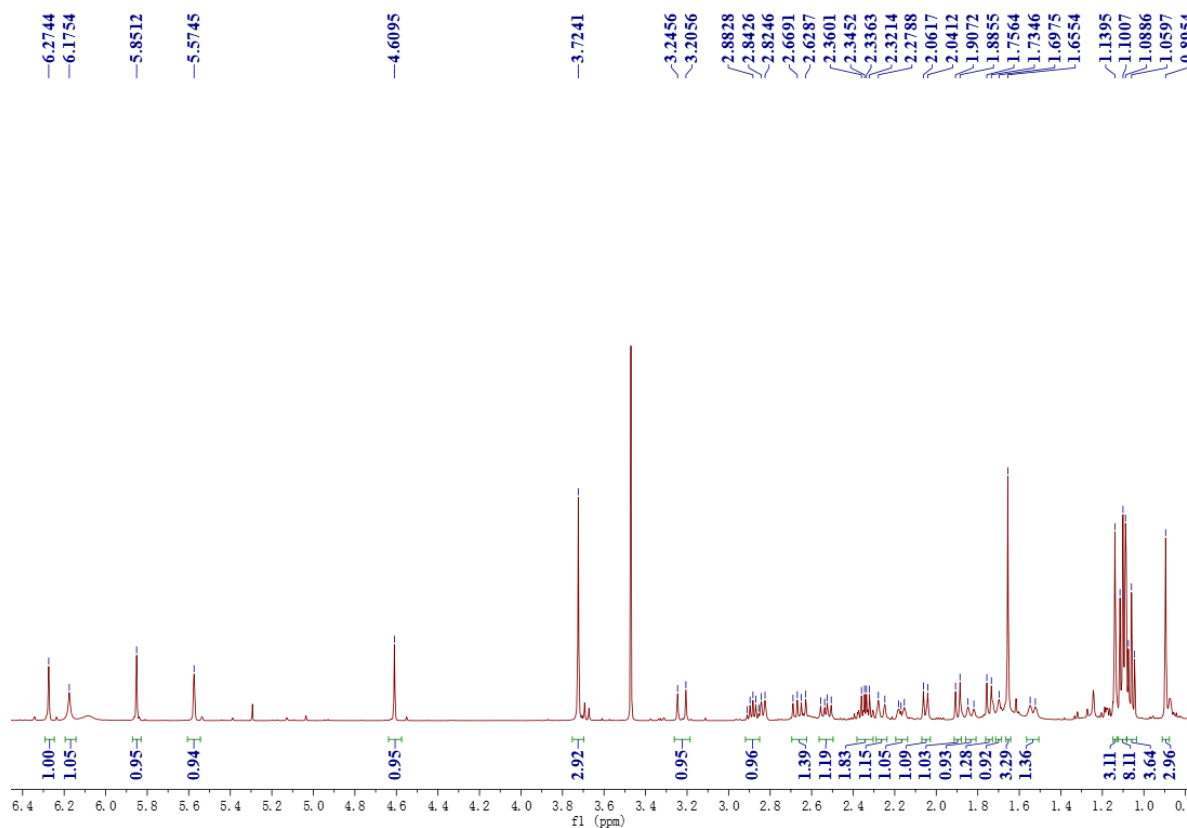

Figure S23.  $^{13}\text{C}$  NMR (125 MHz,  $\text{CDCl}_3$ ) spectrum of compound **4**

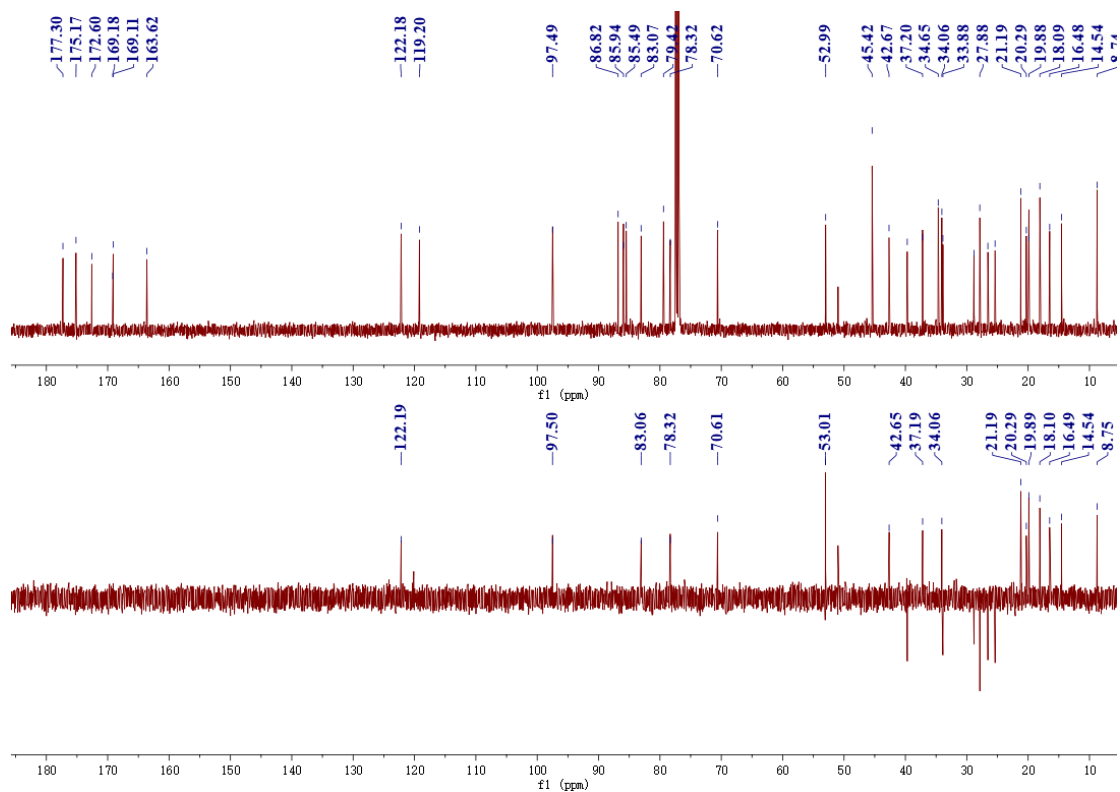

Figure S24. HSQC spectrum of compound **4** in  $\text{CDCl}_3$

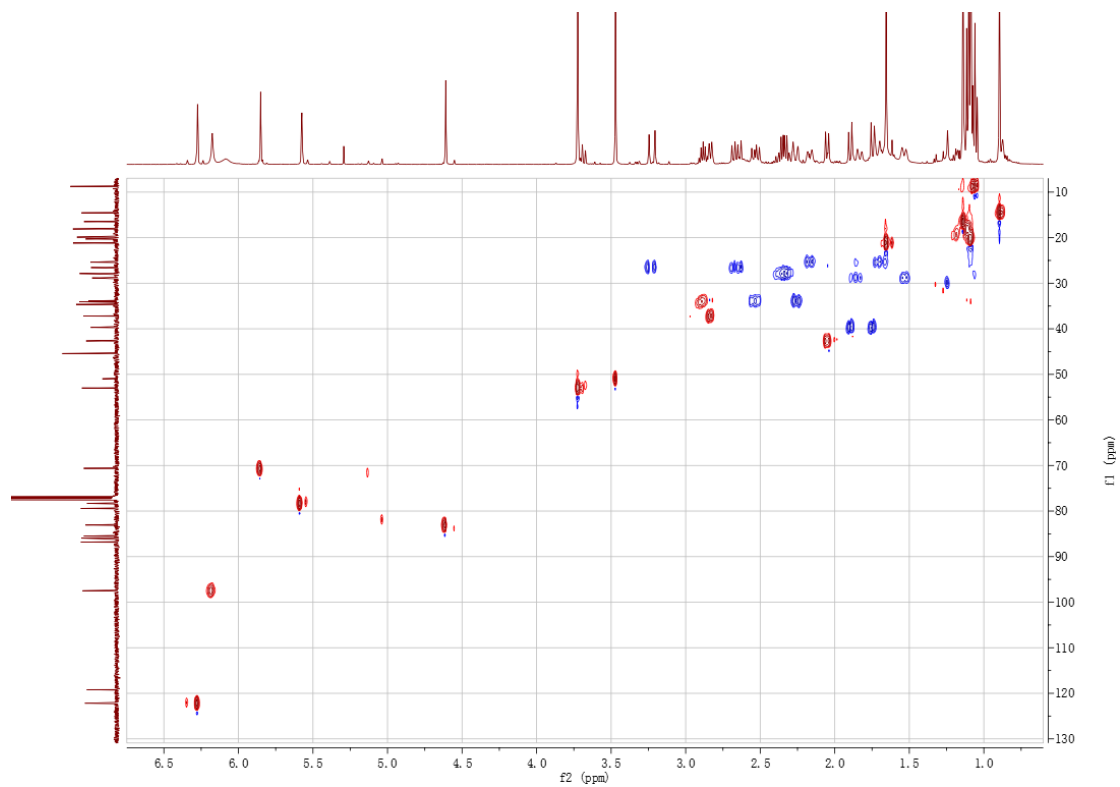

Figure S25.  $^1\text{H}$ - $^1\text{H}$  COSY spectrum of compound **4** in  $\text{CDCl}_3$

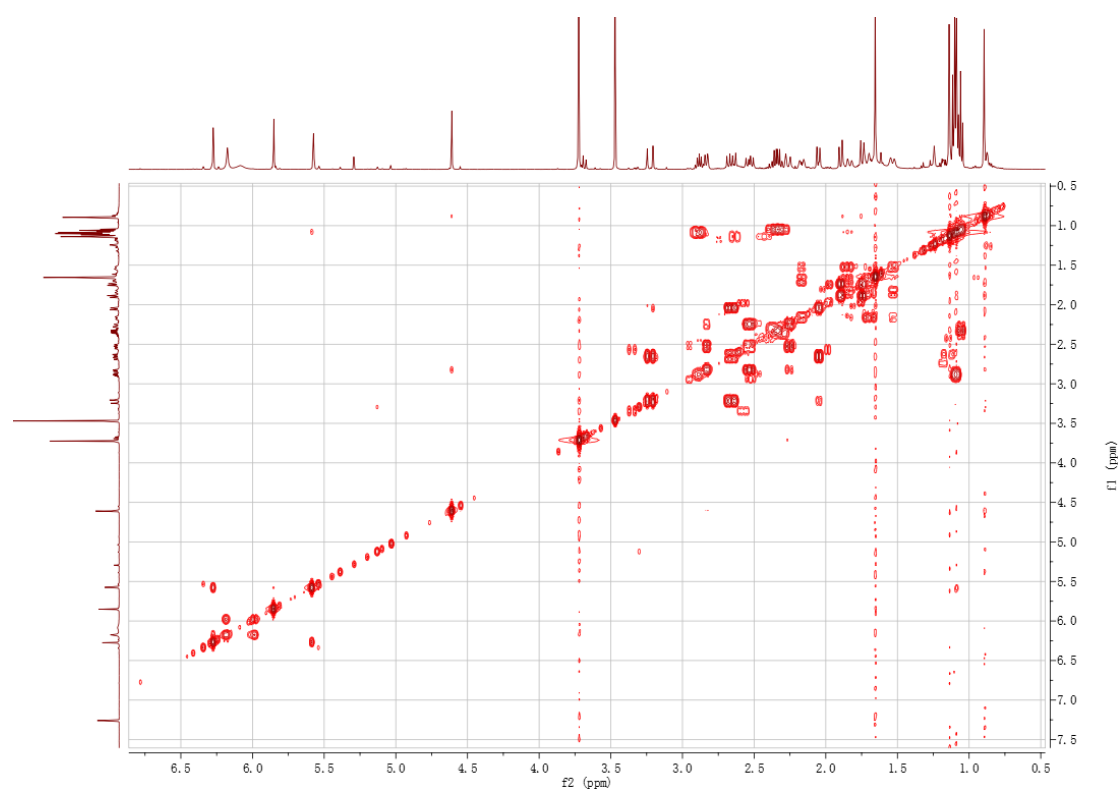

Figure S26. HMBC spectrum of compound **4** in  $\text{CDCl}_3$

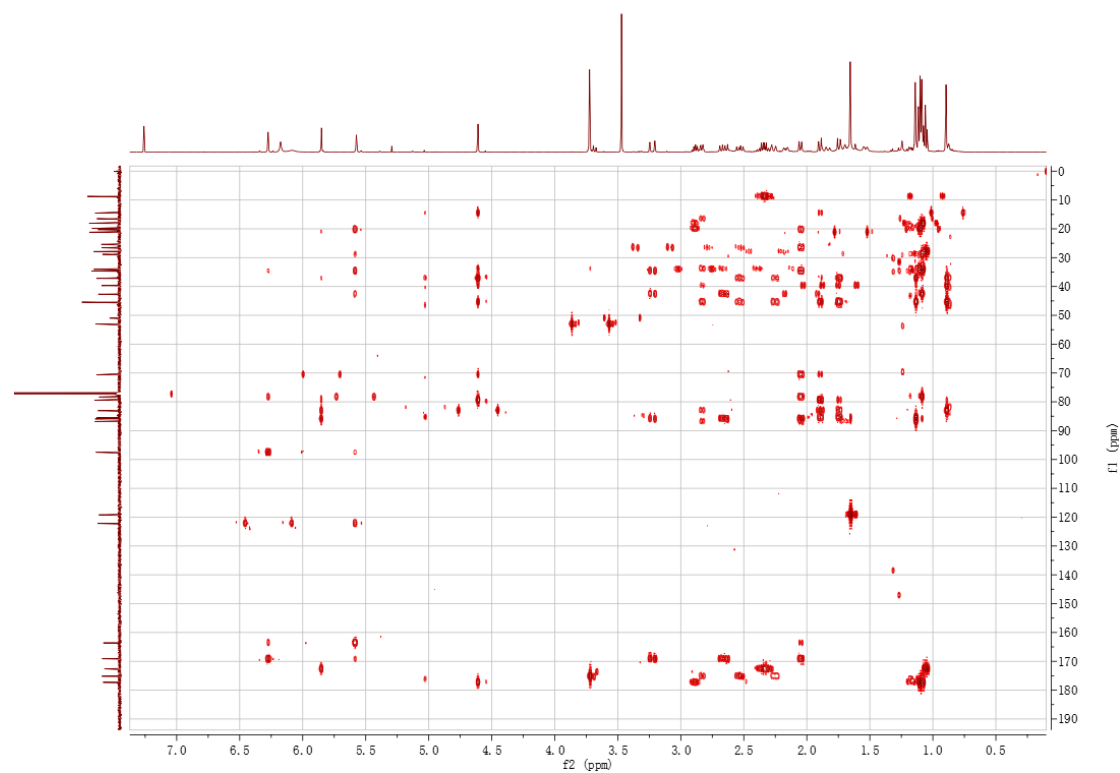

Figure S27. ROESY spectrum of compound **4** in CDCl<sub>3</sub>

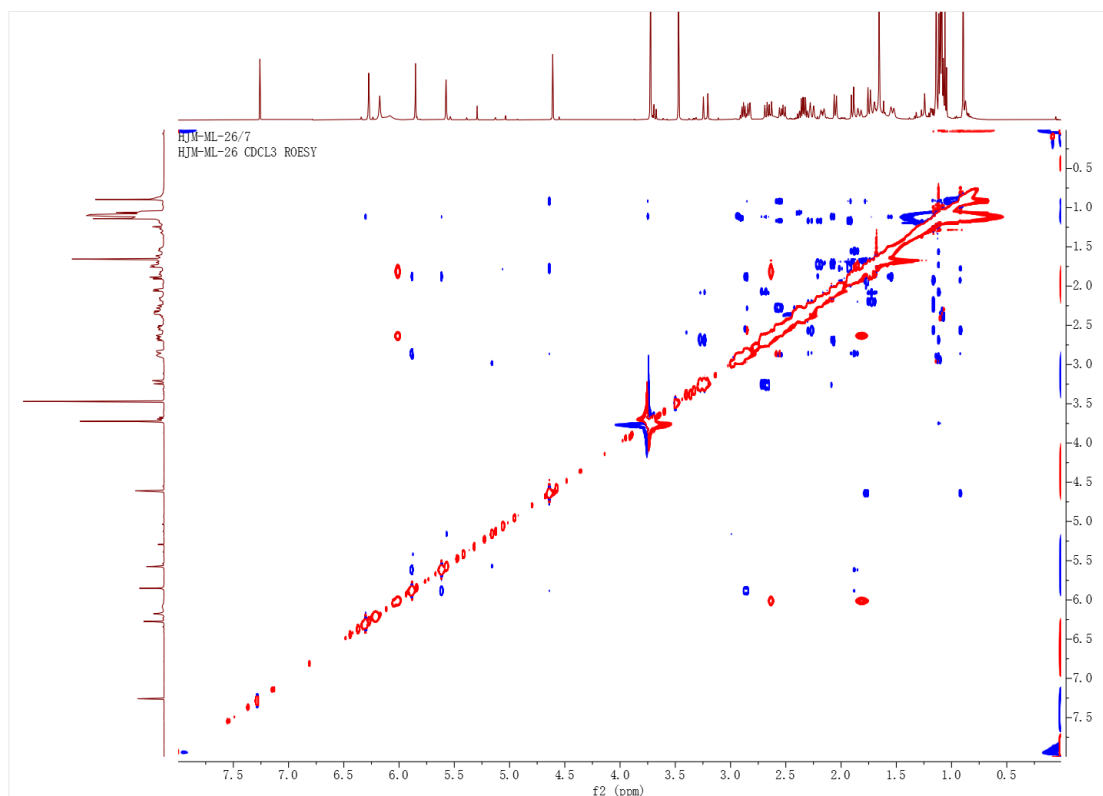

Figure S28. HRESI-MS spectrum of compound **4**

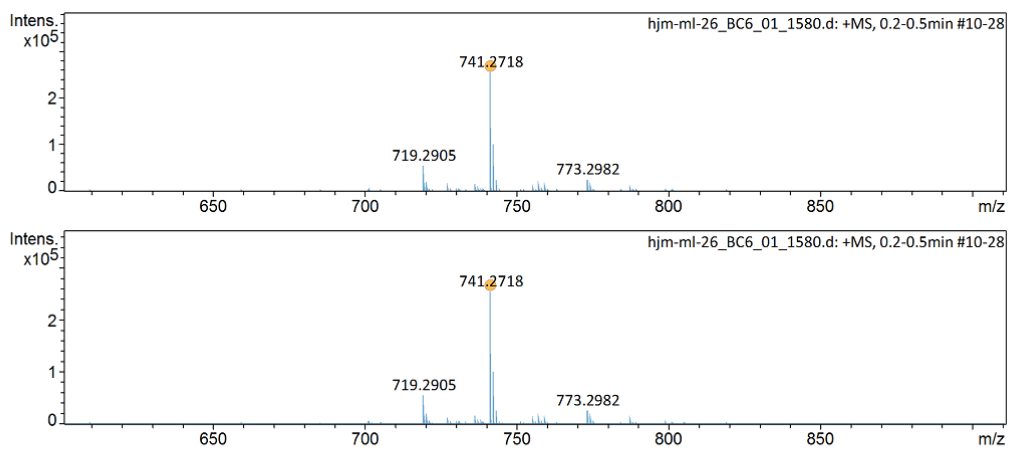

| Meas. m/z | # | Ion Formula                                       | m/z      | err [ppm] | mSigma | # mSigma | Score  | rdb  | e <sup>-</sup> Conf | N-Rule | Adduct |
|-----------|---|---------------------------------------------------|----------|-----------|--------|----------|--------|------|---------------------|--------|--------|
| 741.2718  | 1 | C <sub>36</sub> H <sub>46</sub> NaO <sub>15</sub> | 741.2729 | 1.5       | 5.0    | 1        | 100.00 | 14.0 | even                | ok     | M+Na   |



Figure S29.  $^1\text{H}$  NMR (500 MHz,  $\text{CDCl}_3$ ) spectrum of compound **5**

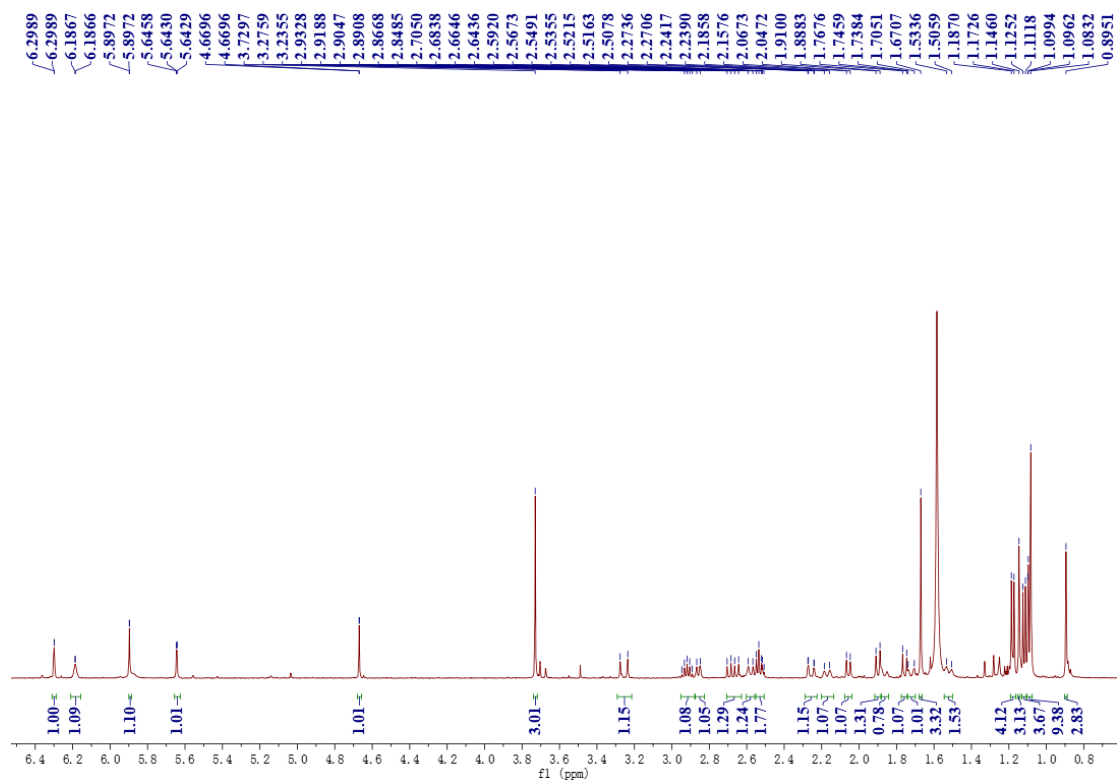

Figure S30.  $^{13}\text{C}$  NMR (125 MHz,  $\text{CDCl}_3$ ) spectrum of compound **5**

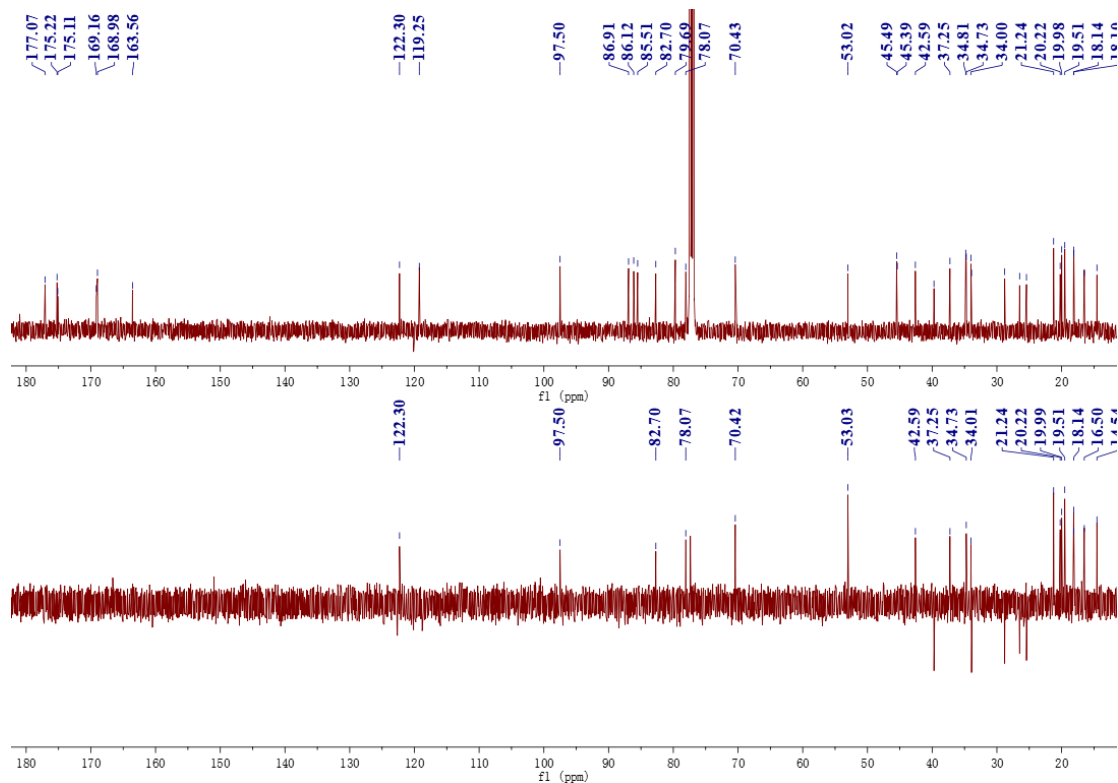

Figure S31. HSQC spectrum of compound **5** in CDCl<sub>3</sub>

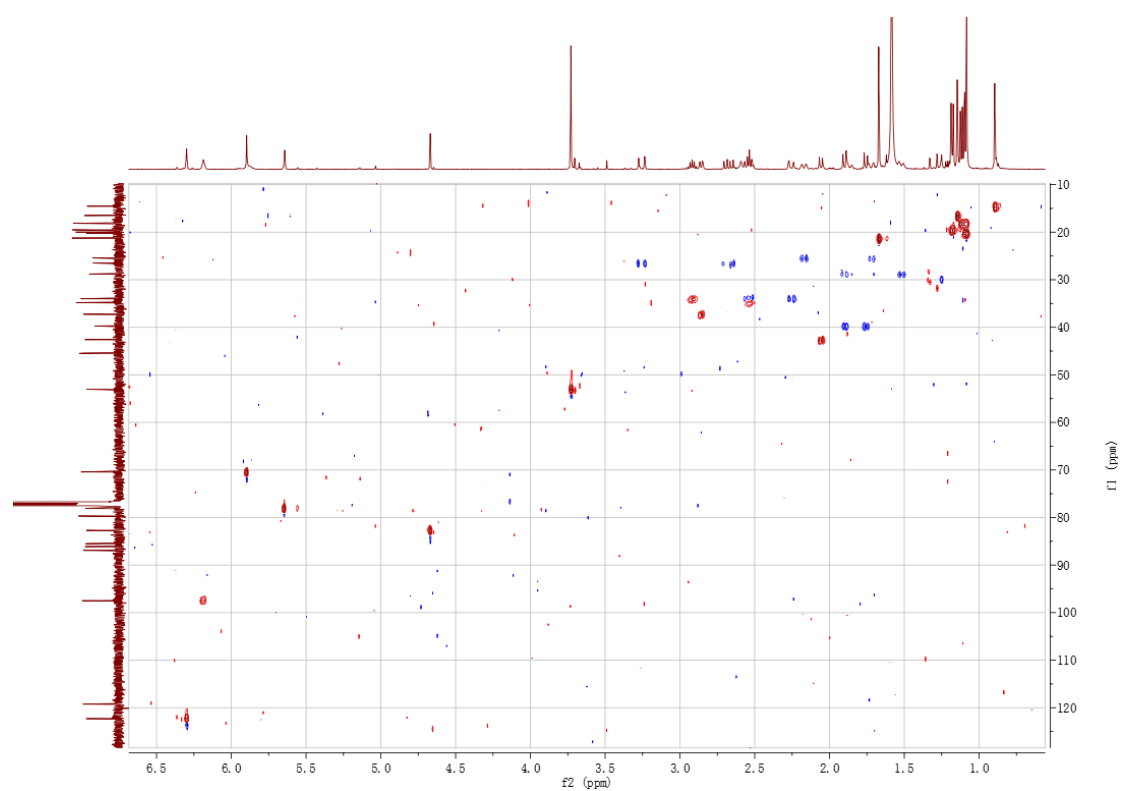

Figure S32. <sup>1</sup>H-<sup>1</sup>H COSY spectrum of compound **5** in CDCl<sub>3</sub>

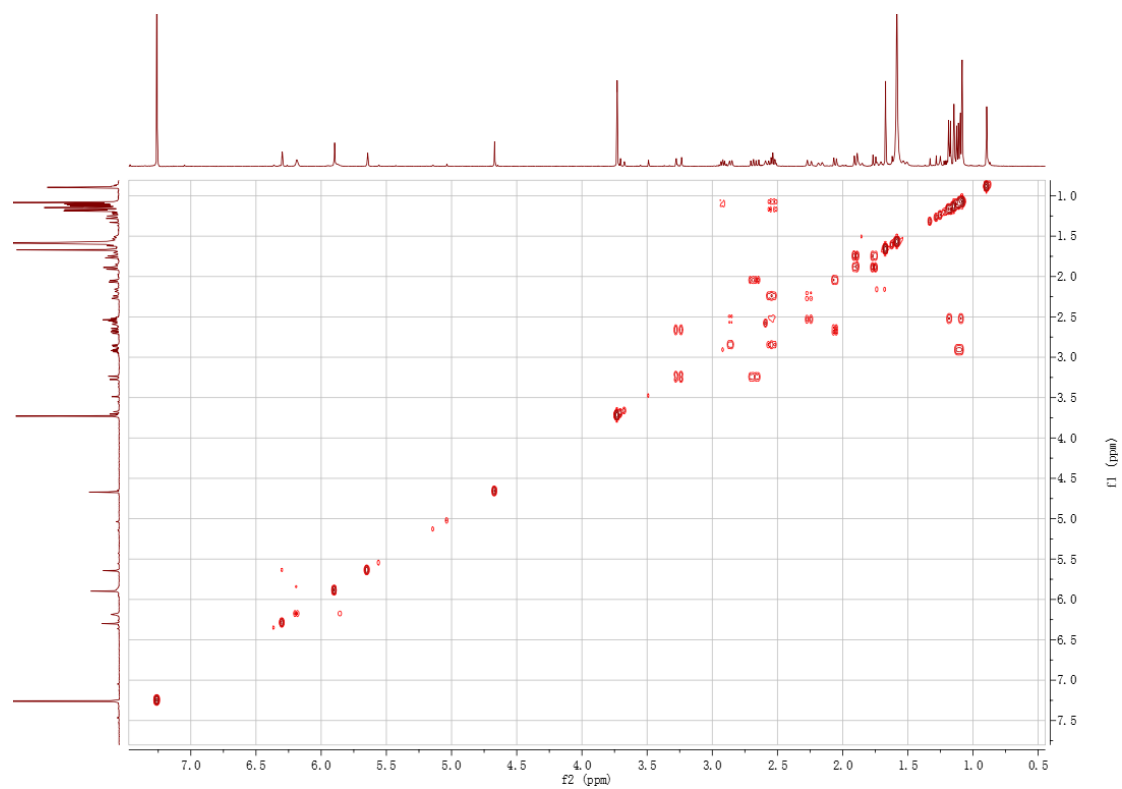

Figure S33. HMBC spectrum of compound **5** in CDCl<sub>3</sub>

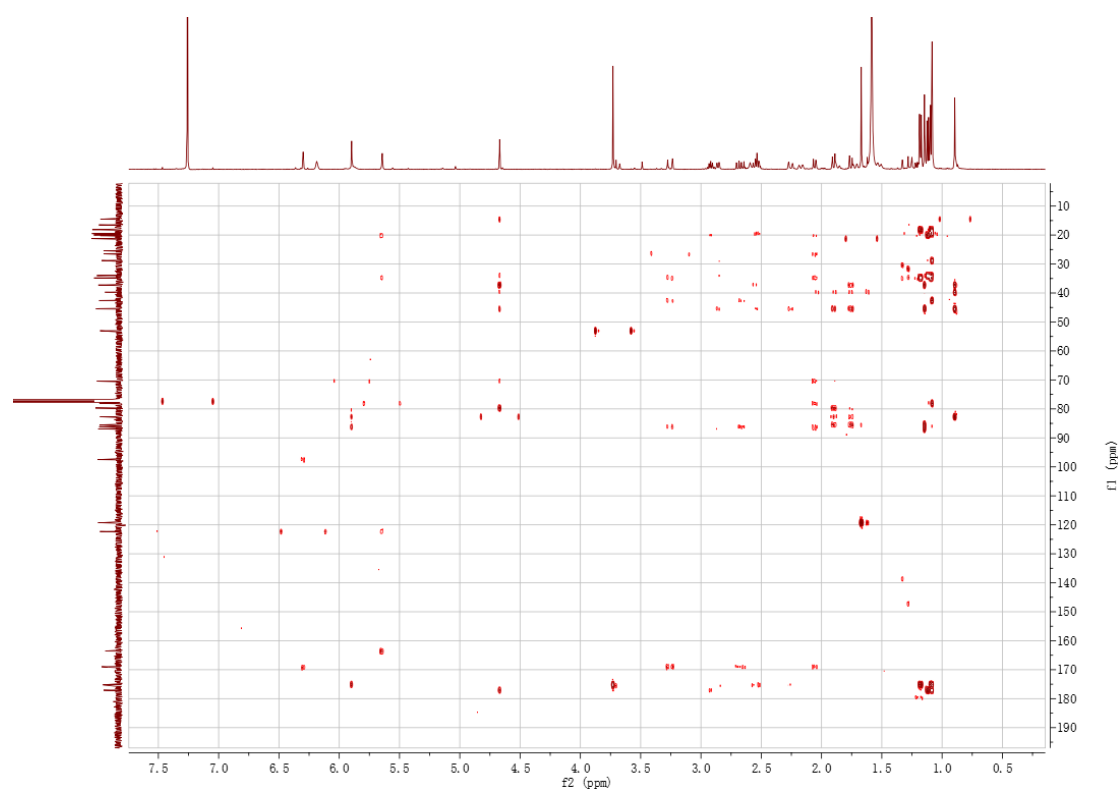

Figure S34. ROESY spectrum of compound **5** in CDCl<sub>3</sub>

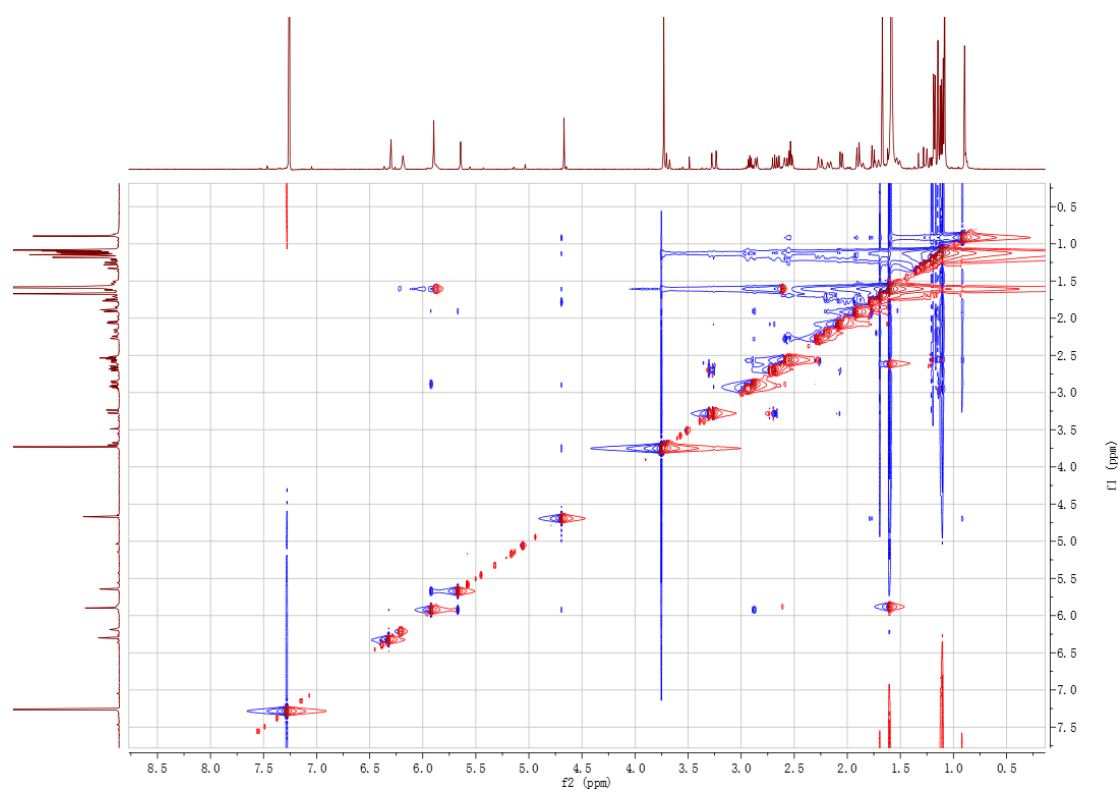

Figure S35. HRESIMS spectrum of compound 5

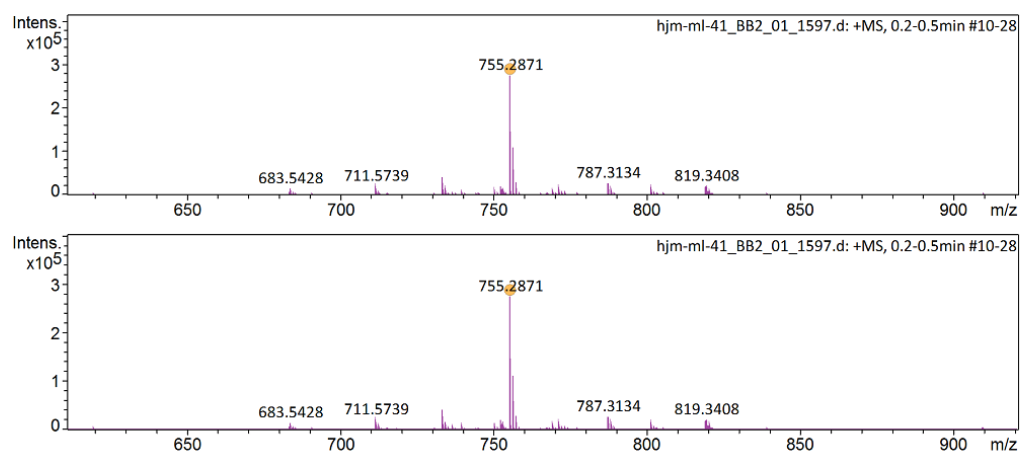

| Meas. m/z | # | Ion Formula                                       | m/z      | err [ppm] | mSigma | # mSigma | Score  | rdb  | e <sup>-</sup> Conf | N-Rule | Adduct |
|-----------|---|---------------------------------------------------|----------|-----------|--------|----------|--------|------|---------------------|--------|--------|
| 755.2871  | 1 | C <sub>37</sub> H <sub>48</sub> NaO <sub>15</sub> | 755.2885 | 2.0       | 7.3    | 1        | 100.00 | 14.0 | even                | ok     | M+Na   |
